# Supplementary material for: Silent Persistence: Molecular Evidence of Clonal Transmission in Fluconazole-Resistant Candida parapsilosis Hospital Outbreaks over Decades
Source: Research Square preprint supplement (doi:10.21203/rs.3.rs-6868881/v1), 2025-07-22
Supplement: Supplementary file 1 [file 6ce460e15cf735ecee9484c1.docx]

**Table A1. Genotypic Distribution of *Candida parapsilosis* Isolates**

| **Isolate Number** | **CP1** | **CP1** | **CP4** | **CP4** | **B5** | **B5** | **Genotype** |
| --- | --- | --- | --- | --- | --- | --- | --- |
| 1379 | 240 | 240 | 259 | 259 | 148 | 148 | Genotype-1 |
| 4615 | 302 | 302 | 259 | 259 | 145 | 145 | Genotype-6 |
| 6265 | 240 | 240 | 259 | 259 | 145 | 145 | Genotype-2 |
| 6283 | 240 | 240 | 259 | 259 | 145 | 145 | Genotype-2 |
| 7903 | 240 | 240 | 277 | 277 | 145 | 145 | Genotype-4 |
| 8169 | 240 | 240 | 259 | 259 | 148 | 148 | Genotype-1 |
| 8262 | 240 | 240 | 259 | 259 | 148 | 148 | Genotype-1 |
| 12097 | 240 | 240 | 259 | 259 | 145 | 145 | Genotype-2 |
| 16660 | 240 | 240 | 259 | 259 | 145 | 145 | Genotype-2 |
| 16888 | 240 | 240 | 259 | 259 | 145 | 145 | Genotype-2 |
| 17154 | 240 | 240 | 249 | 286 | 148 | 148 | Genotype-5 |
| 38038 | 240 | 240 | 259 | 259 | 145 | 145 | Genotype-2 |
| 49190 | 240 | 240 | 259 | 259 | 145 | 145 | Genotype-2 |
| 49519 | 240 | 240 | 259 | 259 | 145 | 145 | Genotype-2 |
| 49721 | 240 | 240 | 259 | 259 | 148 | 148 | Genotype-1 |
| 50138 | 240 | 240 | 259 | 259 | 148 | 148 | Genotype-1 |
| 50539 | 240 | 240 | 259 | 259 | 148 | 148 | Genotype-1 |
| 50553 | 240 | 240 | 259 | 259 | 148 | 148 | Genotype-1 |
| 50717 | 240 | 240 | 259 | 259 | 148 | 148 | Genotype-1 |
| 50902 | 240 | 240 | 259 | 259 | 148 | 148 | Genotype-1 |
| 51153 | 240 | 240 | 259 | 259 | 140 | 140 | Genotype-3 |
| 51216 | 240 | 240 | 259 | 259 | 140 | 140 | Genotype-3 |
| 51240 | 240 | 240 | 259 | 259 | 140 | 140 | Genotype-3 |
| 51241 | 240 | 240 | 259 | 259 | 148 | 148 | Genotype-1 |
| 51489 | 240 | 240 | 259 | 259 | 145 | 145 | Genotype-2 |
| 51705 | 240 | 240 | 277 | 277 | 145 | 145 | Genotype-4 |
| 52223 | 240 | 240 | 259 | 259 | 145 | 145 | Genotype-2 |
| 52544 | 240 | 240 | 259 | 259 | 145 | 145 | Genotype-2 |
| 53204 | 240 | 240 | 259 | 259 | 145 | 145 | Genotype-2 |
| 53912 | 240 | 240 | 259 | 259 | 145 | 145 | Genotype-2 |
| 53913 | 240 | 240 | 259 | 259 | 145 | 145 | Genotype-2 |
| 54096 | 240 | 240 | 259 | 259 | 145 | 145 | Genotype-2 |
| 55460 | 224 | 224 | 259 | 259 | 140 | 140 | Genotype-3 |
| 55633 | 240 | 240 | 259 | 259 | 145 | 145 | Genotype-2 |
| 56041 | 240 | 240 | 259 | 259 | 145 | 145 | Genotype-2 |
| 56579 | 240 | 240 | 277 | 277 | 145 | 145 | Genotype-4 |
| 57006 | 240 | 240 | 259 | 259 | 145 | 145 | Genotype-2 |
| 57113 | 240 | 240 | 259 | 259 | 145 | 145 | Genotype-2 |
| 57914 | 240 | 240 | 259 | 259 | 145 | 145 | Genotype-2 |
| 58601 | 240 | 240 | 259 | 259 | 140 | 140 | Genotype-3 |
| 58924 | 240 | 240 | 259 | 259 | 145 | 145 | Genotype-2 |
| 59818 | 240 | 240 | 277 | 277 | 145 | 145 | Genotype-4 |
| 59819 | 240 | 240 | 259 | 259 | 140 | 140 | Genotype-3 |
| 62136 | 240 | 240 | 259 | 259 | 148 | 148 | Genotype-1 |
| 62535 | 240 | 240 | 277 | 277 | 145 | 145 | Genotype-4 |
| 62662 | 240 | 240 | 249 | 286 | 145 | 145 | Genotype-5 |
| 62764 | 240 | 240 | 259 | 259 | 145 | 145 | Genotype-2 |

**Table A2. Distribution of Isolates by Clinical Services, Genotypes and Time Periods**

| **Isolation Date** | **Clinical isoelated** | **Genotype** |
| --- | --- | --- |
| 1997 | Neurology Service | Genotype-1 |
| 1997 | Pulmonology Service | Genotype-2 |
| 1997 | General Surgery Service | Genotype-2 |
| 1999 | Intensive Care Unit | Genotype-6 |
| 2000 | Plastic Surgery Service | Genotype-4 |
| 2000 | Plastic Surgery Service | Genotype-1 |
| 2000 | Plastic Surgery Service | Genotype-1 |
| 2003 | Neurosurgery Service | Genotype-2 |
| 2005 | Plastic Surgery Service | Genotype-2 |
| 2005 | Intensive Care Unit | Genotype-2 |
| 2005 | Pediatrics Service | Genotype-5 |
| 2012 | Intensive Care Unit | Genotype-2 |
| 2016 | General Surgery Service | Genotype-2 |
| 2016 | Oncology Service | Genotype-2 |
| 2016 | Oncology Service | Genotype-1 |
| 2016 | Pediatrics Service | Genotype-1 |
| 2016 | Oncology Service | Genotype-1 |
| 2016 | Oncology Service | Genotype-1 |
| 2016 | Thoracic Surgery Service | Genotype-1 |
| 2016 | Oncology Service | Genotype-1 |
| 2016 | Gastroenterology service | Genotype-3 |
| 2016 | Neurosurgery Service | Genotype-3 |
| 2016 | Intensive Care Unit | Genotype-3 |
| 2016 | Oncology Service | Genotype-1 |
| 2016 | Oncology Service | Genotype-2 |
| 2016 | Thoracic Surgery Service | Genotype-4 |
| 2016 | Oncology Service | Genotype-2 |
| 2017 | Intensive Care Unit | Genotype-2 |
| 2017 | General Surgery Service | Genotype-2 |
| 2017 | General Surgery Service | Genotype-2 |
| 2017 | Pediatric Surgery Service | Genotype-2 |
| 2017 | General Surgery Service | Genotype-2 |
| 2017 | General Surgery Service | Genotype-3 |
| 2017 | General Surgery Service | Genotype-2 |
| 2018 | General Surgery Service | Genotype-2 |
| 2018 | Intensive Care Unit | Genotype-4 |
| 2018 | General Surgery Service | Genotype-2 |
| 2018 | Neurosurgery Service | Genotype-2 |
| 2018 | General Surgery Service | Genotype-2 |
| 2018 | Cardiovascular Surgery Service | Genotype-3 |
| 2018 | Cardiovascular Surgery Service | Genotype-2 |
| 2018 | Cardiology Service | Genotype-4 |
| 2018 | Pediatrics Service | Genotype-3 |
| 2019 | General Surgery Service | Genotype-1 |
| 2019 | Oncology Service | Genotype-4 |
| 2019 | Pediatric Surgery Service | Genotype-5 |
| 2019 | Pediatrics Service | Genotype-2 |
